# Supplementary material
Source: ML conference proceedings conference paper supplement (https://openreview.net/forum?id=vPN4ay2wyu)
Supplement: supplementary_material [file guidelines questionnaire.pdf › guidelines questionnaire.pdf]

# Guidelines Questionnaire

Your initials:

From a scale of 1-5, how helpful were the guidelines, how would you rate how helpful it was:

|                    | Not very helpful | A bit helpful | Average | Pretty helpful | Very helpful |
|--------------------|------------------|---------------|---------|----------------|--------------|
| Implementation     |                  |               |         |                |              |
| Data               |                  |               |         |                |              |
| Configuration      |                  |               |         |                |              |
| Experimental Setup |                  |               |         |                |              |
| Expertise          |                  |               |         |                |              |

From a scale of 1-5, difficult was it to evaluate the papers with the guidelines:

|                    | Very difficult | A bit difficult | Average | A bit easy | Very easy |
|--------------------|----------------|-----------------|---------|------------|-----------|
| Implementation     |                |                 |         |            |           |
| Data               |                |                 |         |            |           |
| Configuration      |                |                 |         |            |           |
| Experimental Setup |                |                 |         |            |           |
| Expertise          |                |                 |         |            |           |

Do you have any comments you want to leave?
