# Supplementary material
Source: ML conference proceedings conference paper supplement (https://openreview.net/forum?id=vPN4ay2wyu)

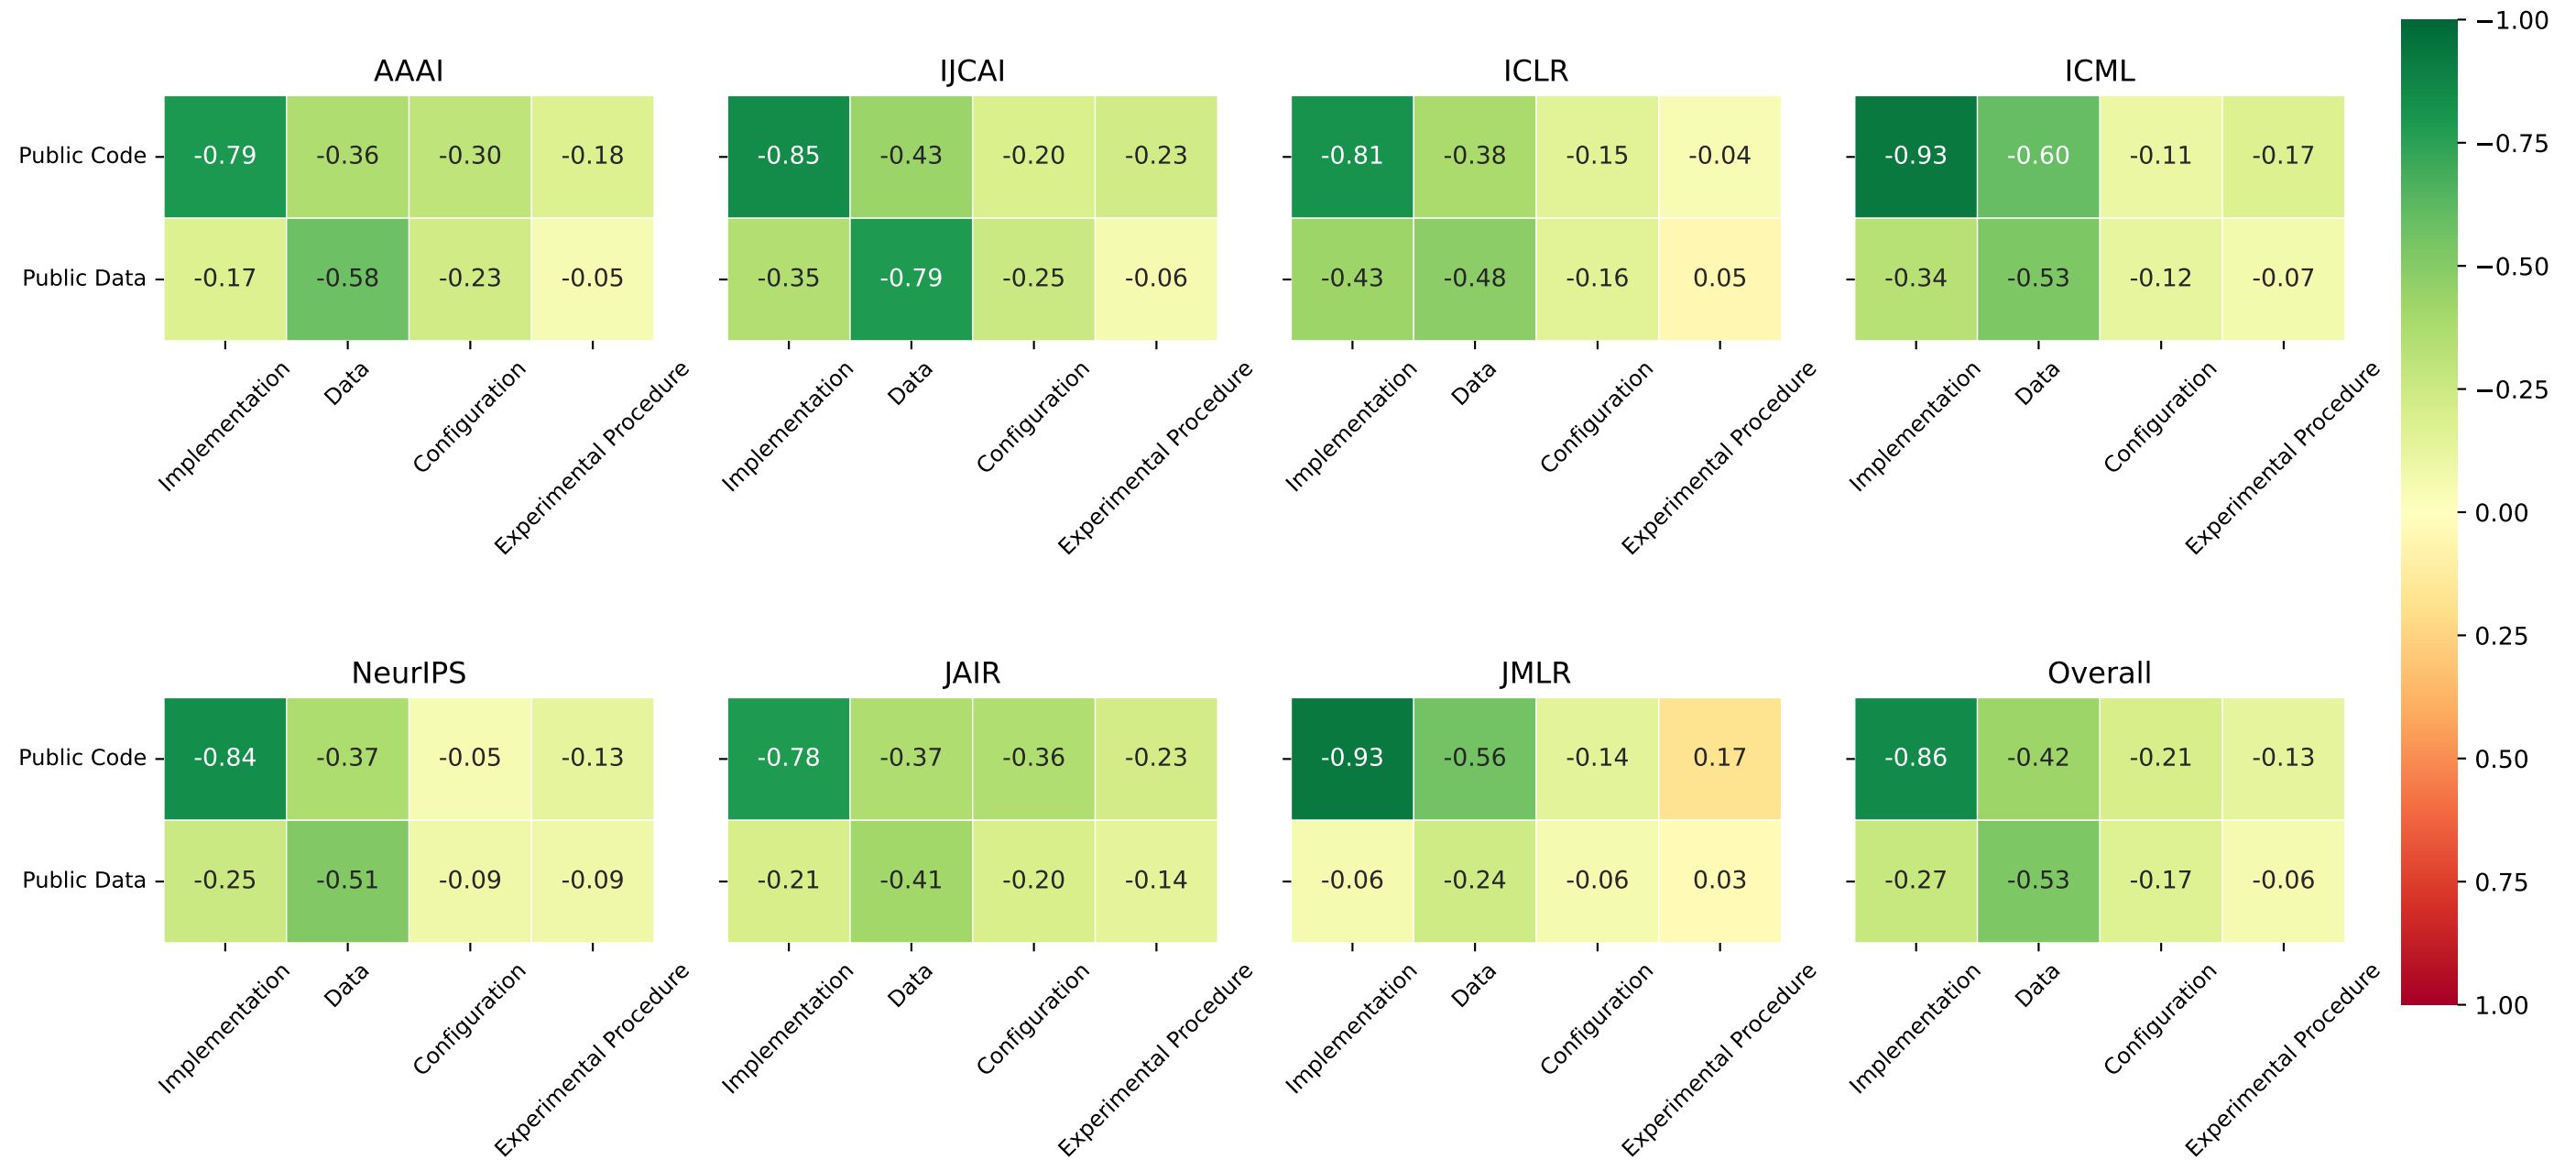

Supplement: supplementary_material [file correlation_total.pdf › latex/plots/correlation_total.pdf]

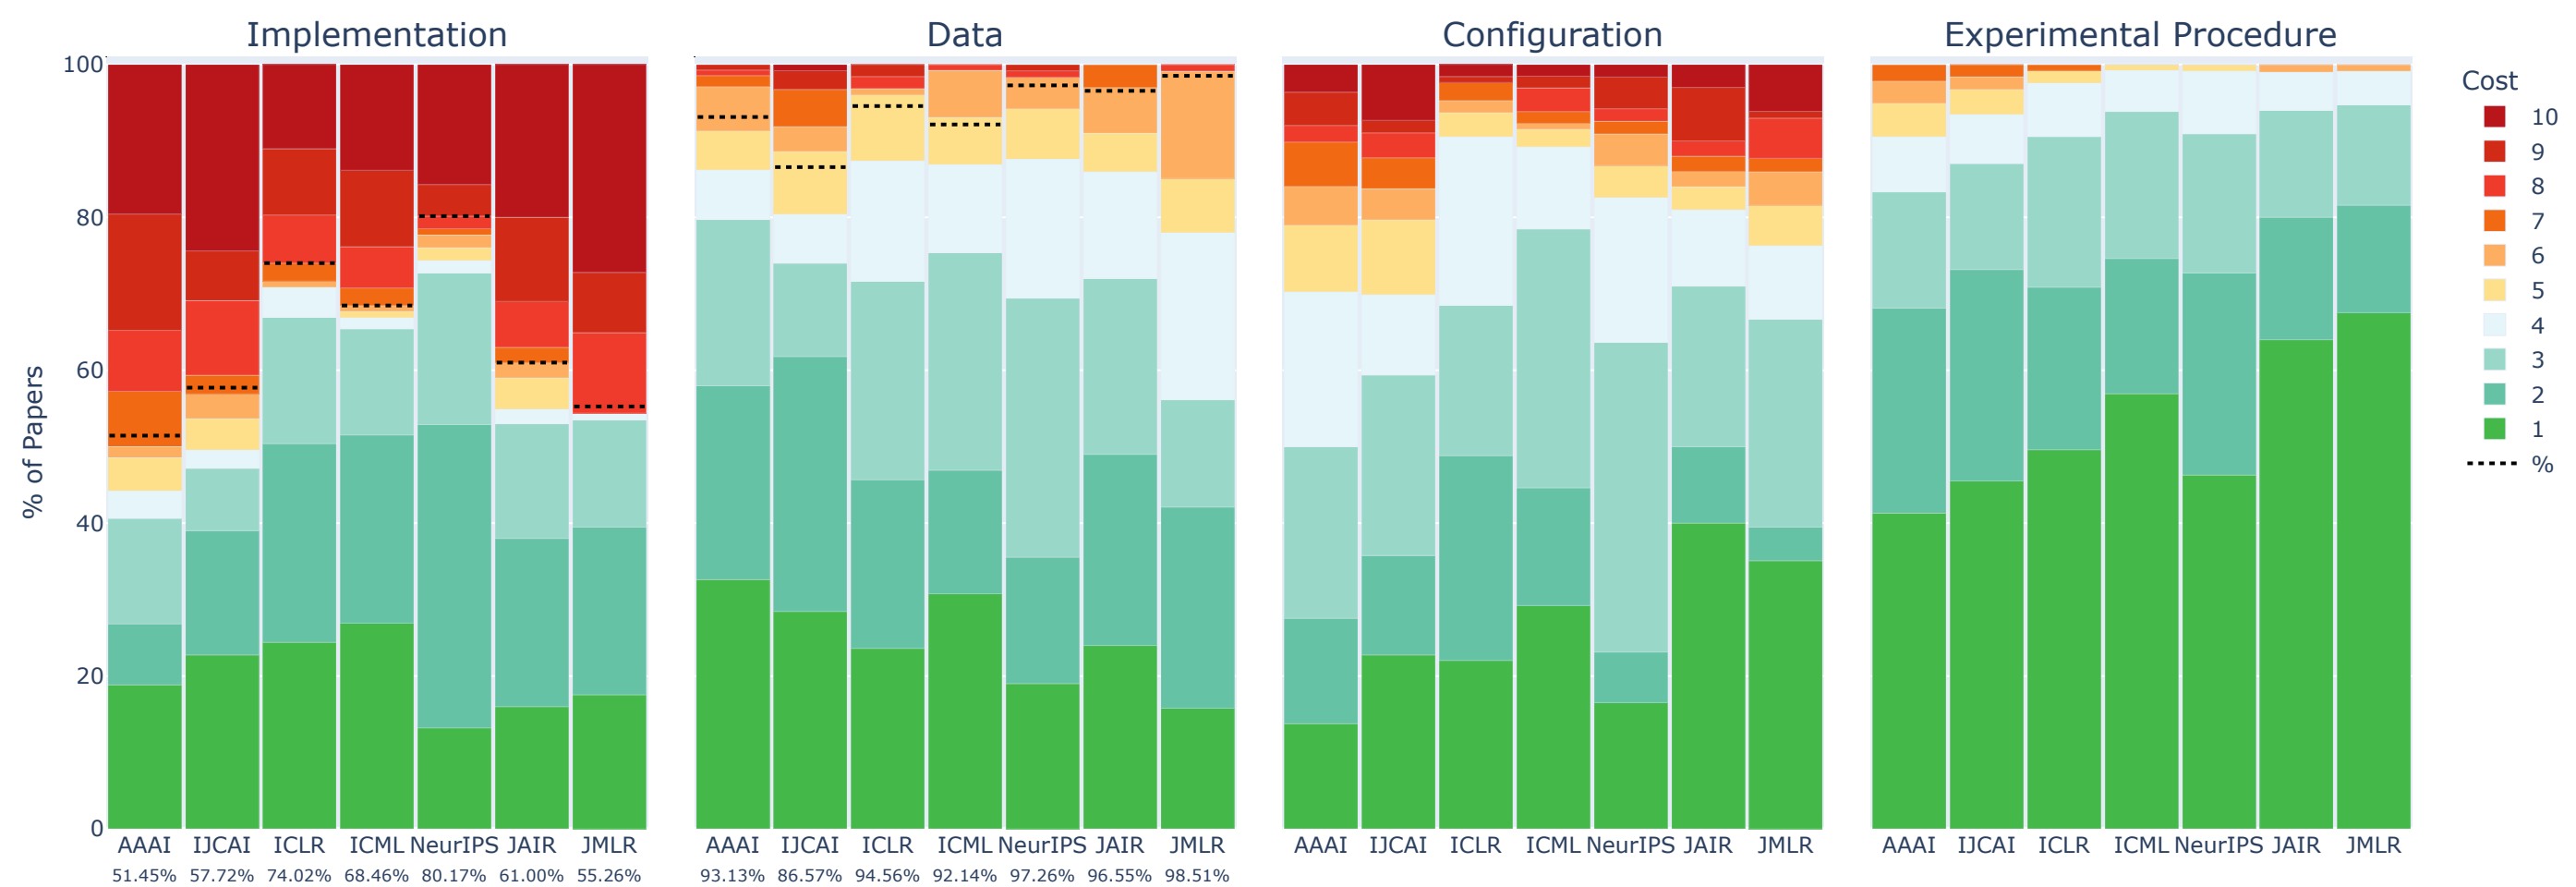

Supplement: supplementary_material [file total_dataset_summary.pdf › latex/plots/total_dataset_summary.pdf]
